# Supplementary material
Source: PubMed Central journal article supplement (PMC8772618)

# Supplemental Figures

## Figure S1.b)

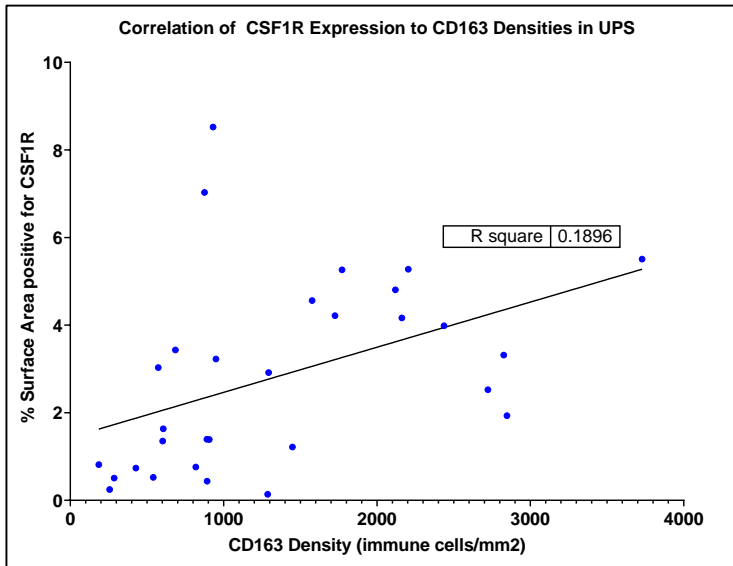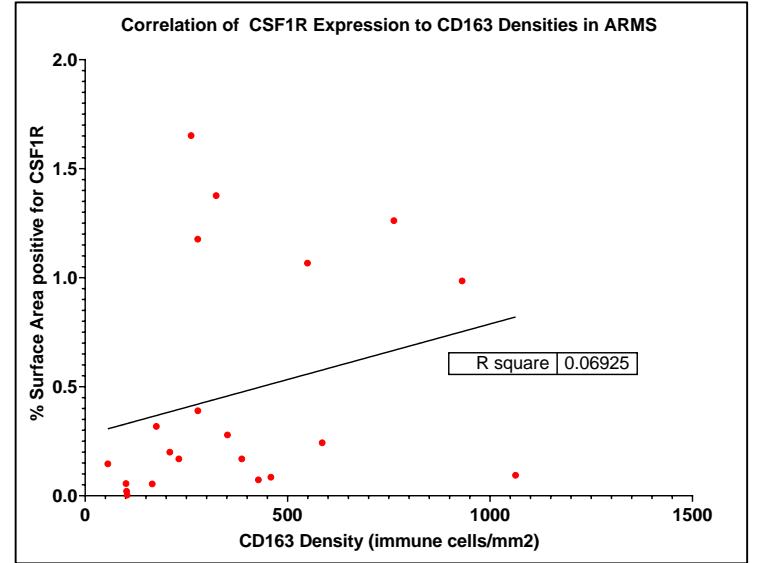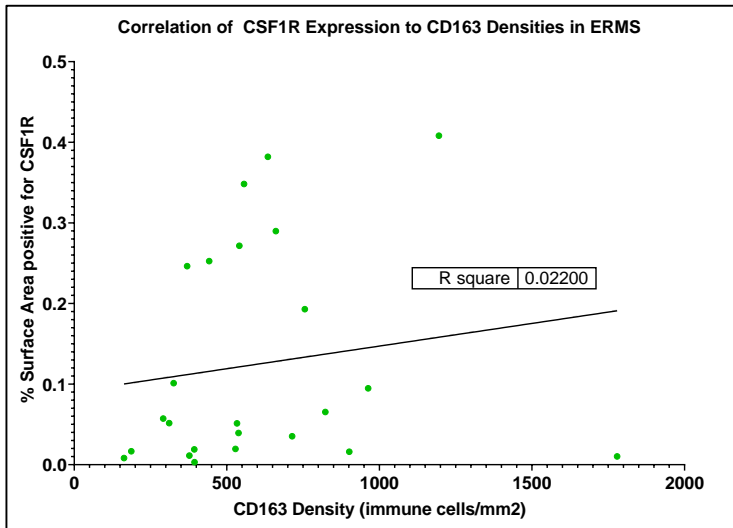

Figure S2:

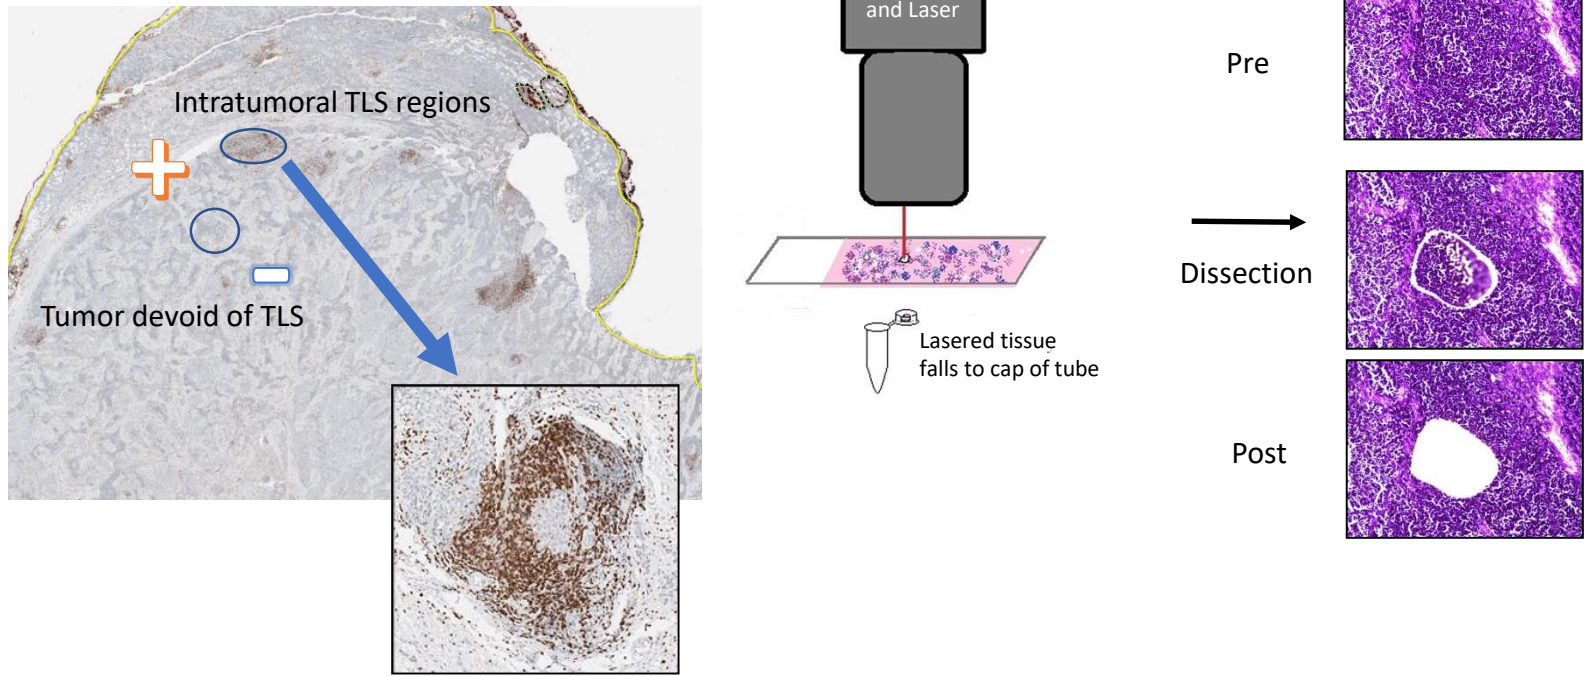

Figure S3.c)

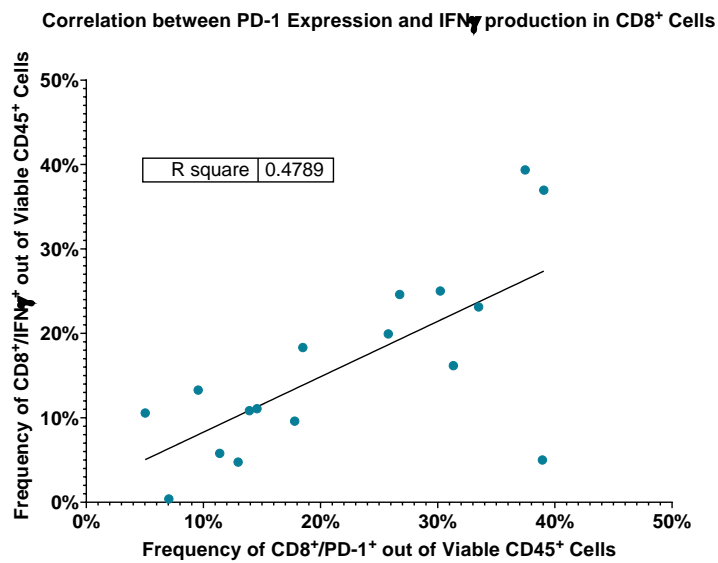

Figure S5.a)

Immune cell composition via immune deconvolution analysis of LMS and UPS samples

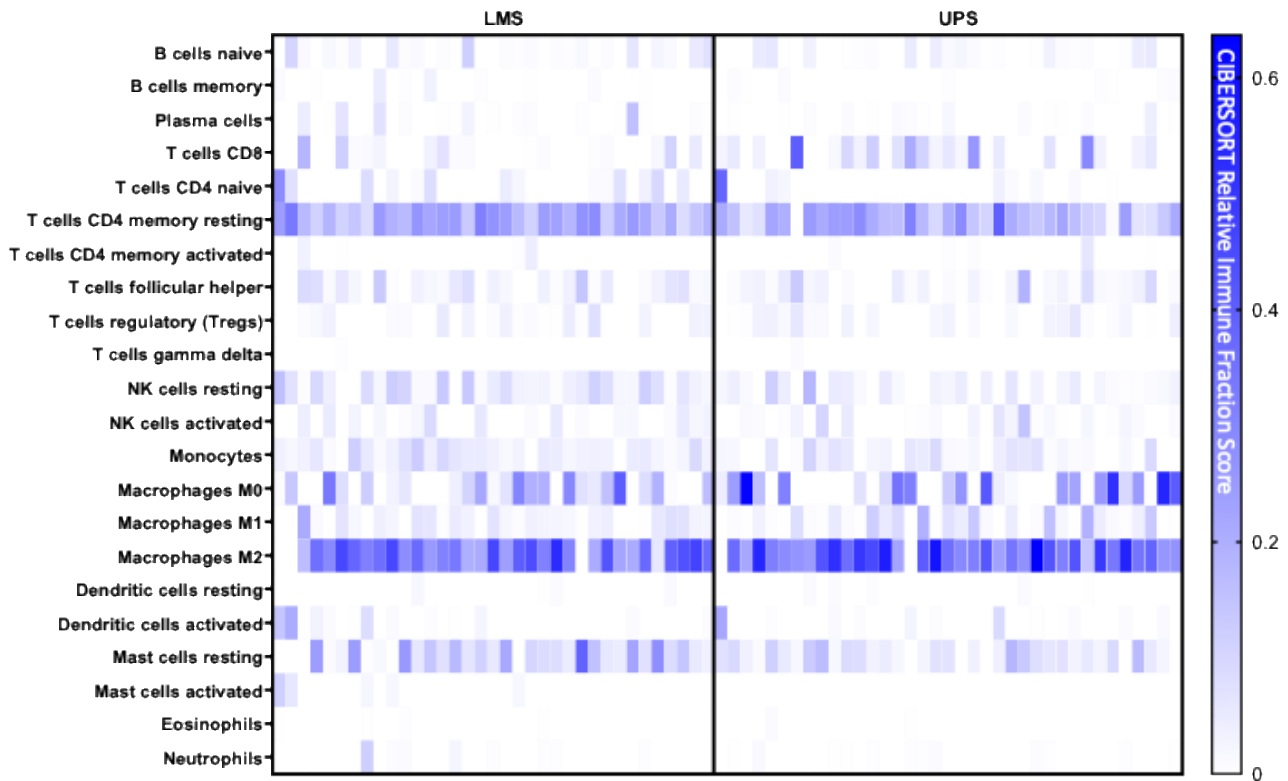

Supplement: NIHMS1748036-supplement-Supplementary_Figures.pdf [file NIHMS1748036-supplement-Supplementary_Figures.pdf]
