# Supplementary material
Source: PubMed Central journal article supplement (PMC8772618)
Supplement: NIHMS1748036-supplement-Supplementary_Tables.pdf [file NIHMS1748036-supplement-Supplementary_Tables.pdf]

**Table Components of Supplementary Figures:**

**Figure S1.a: a) Descriptive Statistics of Immune Cell Densities in STS (Figure 2a)**

|        | Immune Cell Density (cells/mm <sup>2</sup> ) |                  |                  | Paired Comparisons via Mann-Whitney t-test |             |              |
|--------|----------------------------------------------|------------------|------------------|--------------------------------------------|-------------|--------------|
|        | UPS                                          | ERMS             | ARMS             | UPS vs ERMS                                | UPS vs ARMS | ERMS vs ARMS |
| Marker | Mean Density ±SD                             | Mean Density ±SD | Mean Density ±SD | p-value                                    | p-value     | p-value      |
| CD3    | 247.9±322.7                                  | 231.4±209.7      | 294.2±442.2      | 0.846                                      | 0.245       | 0.289        |
| CD8    | 165.9±188.7                                  | 64.27 ±46.1      | 139.5 ±227.6     | 0.0576                                     | 0.138       | 0.8443       |
| Foxp3  | 41.65±42.4                                   | 84.65 ±182.2     | 60.58 ±97.67     | 0.5625                                     | 0.4072      | 0.3951       |
| CD163  | 1236±851.8                                   | 580.9 ±354.5     | 385.4 ±263.4     | 0.0002                                     | <0.0001     | 0.022        |

**Figure S3.a: Subpopulation Frequencies of CD4<sup>+</sup> Cells**

| Markers                               | Frequency from<br>CD4 <sup>+</sup> /Foxp3 <sup>+</sup> | Frequency from<br>CD4 <sup>+</sup> /Foxp3 <sup>-</sup> |
|---------------------------------------|--------------------------------------------------------|--------------------------------------------------------|
|                                       | Mean ±SD                                               | Mean ±SD                                               |
| IFN $\gamma$                          | 11.8% ±18.6%                                           | 42.4% ±22.5%                                           |
| IL-10 <sup>+</sup>                    | 8.0% ±13.1%                                            | 2.6% ±2.5%                                             |
| PD-1 <sup>+</sup>                     | 76.2% ±26.7%                                           | 64.5% ±28.4%                                           |
| PD-1 <sup>+</sup> /TIM-3 <sup>+</sup> | 25.9% ±22.4%                                           | 5.2% ±4.7%                                             |
| PD-1 <sup>+</sup> /LAG-3 <sup>+</sup> | 1.3% ±1.5%                                             | 3.5% ±3.5%                                             |

**Figure S3.b: Subpopulation Frequencies of CD8<sup>+</sup> Cells**

|                               | <b>Frequency from<br/>CD8<sup>+</sup>/PD-1<sup>+</sup></b> | <b>Frequency from<br/>CD8<sup>+</sup>/PD-1<sup>-</sup></b> |
|-------------------------------|------------------------------------------------------------|------------------------------------------------------------|
| <b>Markers</b>                | <b>Mean ±SD</b>                                            | <b>Mean ±SD</b>                                            |
| <b>IFN<math>\gamma</math></b> | <b>57.3% ±24.4%</b>                                        | <b>57.5% ±22.6%</b>                                        |
| <b>IL-10<sup>+</sup></b>      | <b>2.1% ±3.3%</b>                                          | <b>2.2% ±1.6%</b>                                          |
| <b>TIM-3<sup>+</sup></b>      | <b>15.8% ±20.0%</b>                                        | <b>4.6% ±7.1%</b>                                          |
| <b>LAG-3<sup>+</sup></b>      | <b>3.7% ±5.6%</b>                                          | <b>5.4% ±6.3%</b>                                          |

**Figure S4: Demographics and Clinical Information of LMS Cases**

---

|                          |                                         | <b>LMS</b>      |
|--------------------------|-----------------------------------------|-----------------|
|                          |                                         | <b>N=11</b>     |
| <b>Age (years)</b>       | <b>Mean</b>                             | <b>63</b>       |
|                          | <b>Range</b>                            | <b>31-80</b>    |
| <b>Gender</b>            | <b>M</b>                                | <b>1 (9%)</b>   |
|                          | <b>F</b>                                | <b>10 (91%)</b> |
| <b>Treatment History</b> | <b>No Systemic Treatment</b>            | <b>4 (36%)</b>  |
|                          | <b>Chemotherapy</b>                     | <b>3 (27%)</b>  |
|                          | <b>Chemotherapy + Radiation Therapy</b> | <b>1 (9%)</b>   |
|                          | <b>Radiation Therapy</b>                | <b>3 (27%)</b>  |
| <b>Sample Type</b>       | <b>Primary Tumor</b>                    | <b>9 (82%)</b>  |
|                          | <b>Metastatic Lesion</b>                | <b>2 (18%)</b>  |

---

**Figure S5.b: Relative CIBERSORT Fraction Score Means of LMS and UPS with Standard Deviation and Corresponding P-values Calculated via 2way ANOVA**

|                              | LMS           | UPS           | LMS vs UPS |
|------------------------------|---------------|---------------|------------|
|                              | Mean± SD      | Mean±SD       | p value    |
| B cells naive                | 0.019 ± 0.030 | 0.012 ± 0.019 | >0.9999    |
| B cells memory               | 0.003 ± 0.009 | 0.001 ± 0.003 | >0.9999    |
| Plasma cells                 | 0.011 ± 0.031 | 0.003 ± 0.008 | >0.9999    |
| T cells CD8                  | 0.019 ± 0.041 | 0.056 ± 0.092 | 0.156      |
| T cells CD4 naive            | 0.026 ± 0.054 | 0.014 ± 0.063 | >0.9999    |
| T cells CD4 memory resting   | 0.200 ± 0.065 | 0.174 ± 0.084 | 0.729      |
| T cells CD4 memory activated | 0.002 ± 0.009 | 0.002 ± 0.010 | >0.9999    |
| T cells follicular helper    | 0.033 ± 0.038 | 0.027 ± 0.040 | >0.9999    |
| T cells regulatory (Tregs)   | 0.013 ± 0.019 | 0.014 ± 0.017 | >0.9999    |
| T cells gamma delta          | 0.000 ± 0.001 | 0.000 ± 0.001 | >0.9999    |
| NK cells resting             | 0.054 ± 0.046 | 0.027 ± 0.036 | 0.679      |
| NK cells activated           | 0.016 ± 0.023 | 0.016 ± 0.031 | >0.9999    |
| Monocytes                    | 0.042 ± 0.031 | 0.029 ± 0.031 | >0.9999    |
| Macrophages M0               | 0.096 ± 0.112 | 0.152 ± 0.183 | 0.001      |
| Macrophages M1               | 0.032 ± 0.040 | 0.043 ± 0.057 | >0.9999    |
| Macrophages M2               | 0.303 ± 0.139 | 0.355 ± 0.145 | 0.004      |
| Dendritic cells resting      | 0.001 ± 0.004 | 0.001 ± 0.003 | >0.9999    |
| Dendritic cells activated    | 0.015 ± 0.044 | 0.011 ± 0.038 | >0.9999    |
| Mast cells resting           | 0.102 ± 0.098 | 0.060 ± 0.049 | 0.048      |
| Mast cells activated         | 0.007 ± 0.022 | 0.000 ± 0.000 | >0.9999    |
| Eosinophils                  | 0.000 ± 0.001 | 0.000 ± 0.002 | >0.9999    |
| Neutrophils                  | 0.005 ± 0.021 | 0.001 ± 0.003 | >0.9999    |

Highlighted cells are statistically significant with p values < 0.005.

Abbreviations: SD = Standard Deviation; LMS: Leiomyosarcoma; UPS: Undifferentiated Pleomorphic Sarcoma.
